# Supplementary material
Source: publisher figshare collection journal article supplement (https://acs.figshare.com/ndownloader/files/5693709)
Supplement: Supplementary file 1 [file 5693709]

# ic020103d.cif

  data_global

_audit_creation_date               02-05-02

# 1. SUBMISSION DETAILS

_publ_contact_author           # Name and address of author for correspondance
_publ_contact_author        	    Louis Ricard,
				    Labo DCPH,
				    Ecole Polytechnique
				    Route de Saclay
				    91128 Palaiseau
				    France
;
;
_publ_contact_author_phone         '01-69-33-45-72'
_publ_contact_author_fax           '01-69-33-39-90'
_publ_contact_author_email         louis.ricard@polytechnique.fr

_publ_requested_journal            'Inorganic Chemistry'
_publ_requested_coeditor_name      ?

_publ_contact_letter
;
      Please consider this CIF submission for publication as a new structure
      paper in Inorg. Chem.. The figures, chemical
      structure diagram (scheme), Transfert of Copyright Agreement form and
      structure factors will be sent on receipt of your acknowledgement letter
#===================================================================== 

# 2. PROCESSING SUMMARY (IUCr Office Use Only)

_journal_date_recd_electronic     ?

_journal_date_to_coeditor         ?
_journal_date_from_coeditor       ?
_journal_date_accepted            ?

_journal_date_printers_first      ?
_journal_date_printers_final      ?
_journal_date_proofs_out          ?
_journal_date_proofs_in           ?


_journal_coeditor_name            ?
_journal_coeditor_code            ?
_journal_coeditor_notes
; ?
;

_journal_techeditor_code          ?
_journal_techeditor_notes
; ?
;

_journal_coden_ASTM               ?
_journal_name_full                ?
_journal_year                     ?
_journal_volume                   ?

_journal_issue                    ?
_journal_page_first               ?
_journal_page_last                ?

_journal_suppl_publ_number        ?
_journal_suppl_publ_pages         ?

#===================================================================== 

# 3. TITLE AND AUTHOR LIST

_publ_section_title

  Dianionic Platinadiphospholene Complexes.

# The loop structure below should contain the names  and addresses of all
# authors, in the required order  of publication. Repeat as necessary.


loop_
_publ_author_name
     Tirla Cornelia, Mezailles Nicolas, Ricard Louis, Mathey Francois
     and Le Floch Pascal.

_publ_author_address
     Laboratoire Heteroelements et Coordination, CNRS UMR 7653,
     DCPH Ecole Polytechnique,
     F-91128 Palaiseau Cedex
     France
;

#===================================================================== 
# 4. TEXT

_publ_section_abstract
; ?
;

_publ_section_comment
; ?
;

_publ_section_exptl_prep
; ?
;

  All structures were solved using SIR97 (Altomare et al.) and refined with
  SHELXL97 (Sheldrick). Figures were drawn with Platon (Spek, 1990).
;

_publ_section_references
;
  Altomare, A., Cascarano, G., Giacovazzo, C. & Guagliardi, A.
  (1993) J. Appl. Cryst. 26, 343-350.

  Sheldrick, G.M. SHELXL97. Program for crystal structure
  refinement. University of G\\"ottingen, Germany, 1997.

  Sluis, P. v.d., Spek, A.L. (1990). Acta Cryst. A46, 194-201.

  Spek, A.L. (1990). Acta Cryst. A46, C-34.


_publ_section_figure_captions
; ?
;

_publ_section_acknowledgements
; ?
;


#===================================================================== 

data_pt222

_audit_creation_method            SHELXL-97
_chemical_name_systematic
;
  ?
;
_chemical_name_common             ?
_chemical_melting_point           ?
_chemical_formula_moiety          ?
_chemical_formula_sum
  'C88 H112 Li2 N4 O12 P4 Pt'
_chemical_formula_weight          1750.67

loop_
  _atom_type_symbol
  _atom_type_description
  _atom_type_scat_dispersion_real
  _atom_type_scat_dispersion_imag
  _atom_type_scat_source
  'C'  'C'   0.0033   0.0016
  'International Tables Vol C Tables 4.2.6.8 and 6.1.1.4'
  'H'  'H'   0.0000   0.0000
  'International Tables Vol C Tables 4.2.6.8 and 6.1.1.4'
  'N'  'N'   0.0061   0.0033
  'International Tables Vol C Tables 4.2.6.8 and 6.1.1.4'
  'O'  'O'   0.0106   0.0060
  'International Tables Vol C Tables 4.2.6.8 and 6.1.1.4'
  'Li'  'Li'  -0.0003   0.0001
  'International Tables Vol C Tables 4.2.6.8 and 6.1.1.4'
  'P'  'P'   0.1023   0.0942
  'International Tables Vol C Tables 4.2.6.8 and 6.1.1.4'
  'Pt'  'Pt'  -1.7033   8.3905
  'International Tables Vol C Tables 4.2.6.8 and 6.1.1.4'

_symmetry_cell_setting            ?
_symmetry_space_group_name_H-M    ?

loop_
  _symmetry_equiv_pos_as_xyz
  'x, y, z'
  '-x+1/2, -y, z+1/2'
  'x+1/2, -y+1/2, -z'
  '-x, y+1/2, -z+1/2'

_cell_length_a                    12.6947(2)
_cell_length_b                    17.2161(3)
_cell_length_c                    37.8877(5)
_cell_angle_alpha                 90.0000(1)
_cell_angle_beta                  90.0000(1)
_cell_angle_gamma                 90.0000(1)
_cell_volume                      8280.5(2)
_cell_formula_units_Z             4
_cell_measurement_temperature     150.0(10)
_cell_measurement_reflns_used     ?
_cell_measurement_theta_min       ?
_cell_measurement_theta_max       ?

_exptl_crystal_description        ?
_exptl_crystal_colour             ?
_exptl_crystal_size_max           0.15
_exptl_crystal_size_mid           0.06
_exptl_crystal_size_min           0.06
_exptl_crystal_density_meas       ?
_exptl_crystal_density_diffrn     1.404
_exptl_crystal_density_method     'not measured'
_exptl_crystal_F_000              3632
_exptl_absorpt_coefficient_mu     1.835
_exptl_absorpt_correction_type    ?
_exptl_absorpt_correction_T_min   0.7703
_exptl_absorpt_correction_T_max   0.8979
_exptl_absorpt_process_details    ?

_exptl_special_details
;
  ?
;

_diffrn_ambient_temperature       150.0(10)
_diffrn_radiation_wavelength      0.71069
_diffrn_radiation_type            MoK\a
_diffrn_radiation_source          'fine-focus sealed tube'
_diffrn_radiation_monochromator   graphite
_diffrn_measurement_device_type   'KappaCCD'
_diffrn_measurement_method        'phi and omega scans'
_diffrn_detector_area_resol_mean   ?
_diffrn_standards_number           ?
_diffrn_standards_interval_count   ?
_diffrn_standards_interval_time    ?
_diffrn_standards_decay_%          ?
_diffrn_reflns_number             17543
_diffrn_reflns_av_R_equivalents   0.0000
_diffrn_reflns_av_sigmaI/netI     0.0692
_diffrn_reflns_limit_h_min        -16
_diffrn_reflns_limit_h_max        16
_diffrn_reflns_limit_k_min        -22
_diffrn_reflns_limit_k_max        22
_diffrn_reflns_limit_l_min        -49
_diffrn_reflns_limit_l_max        49
_diffrn_reflns_theta_min          1.07
_diffrn_reflns_theta_max          27.50
_reflns_number_total              17543
_reflns_number_gt                 15305
_reflns_threshold_expression      >2sigma(I)

_computing_data_collection        ?
_computing_cell_refinement        ?
_computing_data_reduction         ?
_computing_structure_solution     'SHELXS-97 (Sheldrick, 1990)'
_computing_structure_refinement   'SHELXL-97 (Sheldrick, 1997)'
_computing_molecular_graphics     ?
_computing_publication_material   ?

_refine_special_details
;
  Refinement of F^2^ against ALL reflections.  The weighted R-factor wR and
  goodness of fit S are based on F^2^, conventional R-factors R are based
  on F, with F set to zero for negative F^2^. The threshold expression of
  F^2^ > 2sigma(F^2^) is used only for calculating R-factors(gt) etc. and is
  not relevant to the choice of reflections for refinement.  R-factors based
  on F^2^ are statistically about twice as large as those based on F, and R-
  factors based on ALL data will be even larger.
;

_refine_ls_structure_factor_coef  Fsqd
_refine_ls_matrix_type            full
_refine_ls_weighting_scheme       calc
_refine_ls_weighting_details
  'calc w=1/[\s^2^(Fo^2^)+(0.0405P)^2^+2.5026P] where P=(Fo^2^+2Fc^2^)/3'
_atom_sites_solution_primary      direct
_atom_sites_solution_secondary    difmap
_atom_sites_solution_hydrogens    geom
_refine_ls_hydrogen_treatment     mixed
_refine_ls_extinction_method      none
_refine_ls_extinction_coef        ?
_refine_ls_abs_structure_details
  'Flack H D (1983), Acta Cryst. A39, 876-881'
_refine_ls_abs_structure_Flack    0.005(4)
_refine_ls_number_reflns          17543
_refine_ls_number_parameters      1000
_refine_ls_number_restraints      0
_refine_ls_R_factor_all           0.0550
_refine_ls_R_factor_gt            0.0431
_refine_ls_wR_factor_ref          0.0866
_refine_ls_wR_factor_gt           0.0829
_refine_ls_goodness_of_fit_ref    1.010
_refine_ls_restrained_S_all       1.010
_refine_ls_shift/su_max           0.002
_refine_ls_shift/su_mean          0.000

loop_
  _atom_site_label
  _atom_site_type_symbol
  _atom_site_fract_x
  _atom_site_fract_y
  _atom_site_fract_z
  _atom_site_U_iso_or_equiv
  _atom_site_adp_type
  _atom_site_occupancy
  _atom_site_symmetry_multiplicity
  _atom_site_calc_flag
  _atom_site_refinement_flags
  _atom_site_disorder_assembly
  _atom_site_disorder_group
Pt1 Pt 0.598552(12) 0.041524(10) 0.130625(4) 0.01955(5) Uani 1 1 d . . .
P1 P 0.70009(9) 0.12198(7) 0.16726(3) 0.0219(3) Uani 1 1 d . . .
P2 P 0.67176(9) -0.06147(7) 0.16128(3) 0.0215(3) Uani 1 1 d . . .
P3 P 0.52741(10) 0.14392(7) 0.09881(3) 0.0223(3) Uani 1 1 d . . .
P4 P 0.49532(8) -0.04028(8) 0.09504(3) 0.0207(2) Uani 1 1 d . . .
O1 O 0.9917(3) 0.0376(3) -0.04954(10) 0.0527(10) Uani 1 1 d . . .
O2 O 0.7873(3) 0.0477(3) -0.05456(10) 0.0515(10) Uani 1 1 d . . .
O3 O 0.8121(3) -0.2390(2) -0.06569(10) 0.0487(10) Uani 1 1 d . . .
O4 O 0.9612(4) -0.1507(3) -0.02874(11) 0.0657(14) Uani 1 1 d . . .
O5 O 0.8398(3) 0.0536(2) 0.03054(9) 0.0399(9) Uani 1 1 d . . .
O6 O 0.7461(3) -0.0694(2) 0.00352(9) 0.0325(8) Uani 1 1 d . . .
O7 O 0.2080(3) 0.0648(2) 0.23578(9) 0.0481(11) Uani 1 1 d . . .
O8 O 0.1614(3) 0.1145(2) 0.29980(10) 0.0465(10) Uani 1 1 d . . .
O9 O 0.1767(3) -0.1051(2) 0.30448(10) 0.0455(10) Uani 1 1 d . . .
O10 O 0.3839(3) -0.0660(2) 0.27472(9) 0.0396(9) Uani 1 1 d . . .
O11 O 0.3821(3) 0.1918(2) 0.27896(10) 0.0431(10) Uani 1 1 d . . .
O12 O 0.3809(3) 0.0871(2) 0.32960(9) 0.0384(9) Uani 1 1 d . . .
N1 N 1.0221(4) -0.0298(3) 0.01646(11) 0.0413(12) Uani 1 1 d . . .
N2 N 0.6808(4) -0.1018(3) -0.07052(12) 0.0431(12) Uani 1 1 d . . .
N3 N 0.4227(4) 0.0703(3) 0.23308(12) 0.0476(14) Uani 1 1 d . . .
N4 N 0.1918(4) 0.0092(3) 0.35968(11) 0.0496(13) Uani 1 1 d . . .
C1 C 0.7593(3) 0.0560(3) 0.20076(11) 0.0215(10) Uani 1 1 d . . .
C2 C 0.7605(3) -0.0217(3) 0.19464(11) 0.0218(10) Uani 1 1 d . . .
C3 C 0.4342(3) 0.1037(3) 0.06774(11) 0.0227(10) Uani 1 1 d . . .
C4 C 0.4326(3) 0.0249(3) 0.06207(11) 0.0211(10) Uani 1 1 d . . .
C5 C 0.8186(4) 0.1488(3) 0.14213(11) 0.0242(11) Uani 1 1 d . . .
C6 C 0.9220(4) 0.1260(3) 0.15043(12) 0.0317(12) Uani 1 1 d . . .
H6 H 0.9327 0.0902 0.1692 0.038 Uiso 1 1 calc R . .
C7 C 1.0086(4) 0.1537(3) 0.13233(16) 0.0432(13) Uani 1 1 d . . .
H7 H 1.0772 0.1367 0.1387 0.052 Uiso 1 1 calc R . .
C8 C 0.9958(5) 0.2060(4) 0.10503(14) 0.0433(15) Uani 1 1 d . . .
H8 H 1.0553 0.2258 0.0928 0.052 Uiso 1 1 calc R . .
C9 C 0.8962(5) 0.2289(3) 0.09591(13) 0.0409(13) Uani 1 1 d . . .
H9 H 0.8869 0.2642 0.0769 0.049 Uiso 1 1 calc R . .
C10 C 0.8081(4) 0.2015(3) 0.11393(14) 0.0344(12) Uani 1 1 d . . .
H10 H 0.7399 0.2186 0.1071 0.041 Uiso 1 1 calc R . .
C11 C 0.7576(3) -0.1228(3) 0.13380(13) 0.0227(9) Uani 1 1 d . . .
C12 C 0.8676(4) -0.1240(3) 0.13611(13) 0.0303(11) Uani 1 1 d . . .
H12 H 0.9019 -0.0891 0.1518 0.036 Uiso 1 1 calc R . .
C13 C 0.9275(4) -0.1744(3) 0.11622(14) 0.0376(13) Uani 1 1 d . . .
H13 H 1.0020 -0.1744 0.1187 0.045 Uiso 1 1 calc R . .
C14 C 0.8799(4) -0.2250(3) 0.09264(13) 0.0342(12) Uani 1 1 d . . .
H14 H 0.9215 -0.2595 0.0789 0.041 Uiso 1 1 calc R . .
C15 C 0.7721(4) -0.2250(3) 0.08926(13) 0.0320(12) Uani 1 1 d . . .
H15 H 0.7389 -0.2588 0.0728 0.038 Uiso 1 1 calc R . .
C16 C 0.7113(4) -0.1747(3) 0.11031(13) 0.0300(11) Uani 1 1 d . . .
H16 H 0.6367 -0.1761 0.1084 0.036 Uiso 1 1 calc R . .
C17 C 0.7889(4) 0.0932(3) 0.23500(12) 0.0241(11) Uani 1 1 d . . .
C18 C 0.8278(4) 0.1674(3) 0.23630(13) 0.0287(11) Uani 1 1 d . . .
H18 H 0.8445 0.1934 0.2149 0.034 Uiso 1 1 calc R . .
C19 C 0.8437(4) 0.2059(3) 0.26855(14) 0.0344(13) Uani 1 1 d . . .
H19 H 0.8710 0.2573 0.2688 0.041 Uiso 1 1 calc R . .
C20 C 0.8196(4) 0.1689(3) 0.30000(14) 0.0361(13) Uani 1 1 d . . .
H20 H 0.8288 0.1950 0.3219 0.043 Uiso 1 1 calc R . .
C21 C 0.7825(4) 0.0948(3) 0.29918(13) 0.0342(12) Uani 1 1 d . . .
H21 H 0.7675 0.0687 0.3207 0.041 Uiso 1 1 calc R . .
C22 C 0.7664(4) 0.0571(3) 0.26756(12) 0.0299(12) Uani 1 1 d . . .
H22 H 0.7395 0.0056 0.2677 0.036 Uiso 1 1 calc R . .
C23 C 0.8160(4) -0.0777(3) 0.21776(12) 0.0246(11) Uani 1 1 d . . .
C24 C 0.9227(4) -0.0680(3) 0.22551(13) 0.0308(12) Uani 1 1 d . . .
H24 H 0.9600 -0.0262 0.2150 0.037 Uiso 1 1 calc R . .
C25 C 0.9757(4) -0.1176(3) 0.24813(14) 0.0407(14) Uani 1 1 d . . .
H25 H 1.0483 -0.1097 0.2530 0.049 Uiso 1 1 calc R . .
C26 C 0.9225(5) -0.1785(3) 0.26345(15) 0.0441(15) Uani 1 1 d . . .
H26 H 0.9575 -0.2116 0.2797 0.053 Uiso 1 1 calc R . .
C27 C 0.8191(5) -0.1912(3) 0.25521(14) 0.0371(13) Uani 1 1 d . . .
H27 H 0.7836 -0.2348 0.2649 0.045 Uiso 1 1 calc R . .
C28 C 0.7657(4) -0.1417(3) 0.23295(12) 0.0277(11) Uani 1 1 d . . .
H28 H 0.6935 -0.1512 0.2279 0.033 Uiso 1 1 calc R . .
C29 C 0.4477(4) 0.2106(3) 0.12547(12) 0.0220(10) Uani 1 1 d . . .
C30 C 0.4991(4) 0.2709(3) 0.14348(12) 0.0303(12) Uani 1 1 d . . .
H30 H 0.5735 0.2751 0.1418 0.036 Uiso 1 1 calc R . .
C31 C 0.4435(5) 0.3249(3) 0.16379(13) 0.0343(13) Uani 1 1 d . . .
H31 H 0.4802 0.3647 0.1761 0.041 Uiso 1 1 calc R . .
C32 C 0.3363(4) 0.3203(3) 0.16594(14) 0.0359(13) Uani 1 1 d . . .
H32 H 0.2982 0.3578 0.1792 0.043 Uiso 1 1 calc R . .
C33 C 0.2832(4) 0.2614(3) 0.14891(14) 0.0357(13) Uani 1 1 d . . .
H33 H 0.2087 0.2581 0.1507 0.043 Uiso 1 1 calc R . .
C34 C 0.3381(4) 0.2068(3) 0.12921(15) 0.0310(11) Uani 1 1 d . . .
H34 H 0.3005 0.1660 0.1180 0.037 Uiso 1 1 calc R . .
C35 C 0.3792(3) -0.0668(3) 0.12178(11) 0.0243(11) Uani 1 1 d . . .
C36 C 0.3920(4) -0.1240(3) 0.14813(12) 0.0283(10) Uani 1 1 d . . .
H36 H 0.4600 -0.1452 0.1522 0.034 Uiso 1 1 calc R . .
C37 C 0.3085(4) -0.1499(3) 0.16799(13) 0.0355(12) Uani 1 1 d . . .
H37 H 0.3199 -0.1883 0.1856 0.043 Uiso 1 1 calc R . .
C38 C 0.2082(4) -0.1208(3) 0.16273(13) 0.0390(13) Uani 1 1 d . . .
H38 H 0.1507 -0.1390 0.1765 0.047 Uiso 1 1 calc R . .
C39 C 0.1932(4) -0.0650(3) 0.13722(13) 0.0355(13) Uani 1 1 d . . .
H39 H 0.1247 -0.0444 0.1334 0.043 Uiso 1 1 calc R . .
C40 C 0.2774(3) -0.0386(3) 0.11703(11) 0.0282(10) Uani 1 1 d . . .
H40 H 0.2651 -0.0002 0.0995 0.034 Uiso 1 1 calc R . .
C41 C 0.3753(4) 0.1586(3) 0.04476(12) 0.0255(11) Uani 1 1 d . . .
C42 C 0.4268(4) 0.2136(3) 0.02404(13) 0.0365(13) Uani 1 1 d . . .
H42 H 0.5013 0.2180 0.0254 0.044 Uiso 1 1 calc R . .
C43 C 0.3712(5) 0.2622(3) 0.00138(16) 0.0475(17) Uani 1 1 d . . .
H43 H 0.4075 0.2983 -0.0131 0.057 Uiso 1 1 calc R . .
C44 C 0.2627(6) 0.2574(4) 0.00017(18) 0.0557(19) Uani 1 1 d . . .
H44 H 0.2243 0.2900 -0.0154 0.067 Uiso 1 1 calc R . .
C45 C 0.2102(5) 0.2060(3) 0.02135(16) 0.0463(15) Uani 1 1 d . . .
H45 H 0.1355 0.2040 0.0209 0.056 Uiso 1 1 calc R . .
C46 C 0.2662(4) 0.1567(3) 0.04341(13) 0.0320(12) Uani 1 1 d . . .
H46 H 0.2291 0.1209 0.0579 0.038 Uiso 1 1 calc R . .
C47 C 0.3947(4) -0.0141(3) 0.02915(11) 0.0215(9) Uani 1 1 d . . .
C48 C 0.3614(4) -0.0910(3) 0.03018(13) 0.0277(11) Uani 1 1 d . . .
H48 H 0.3564 -0.1165 0.0523 0.033 Uiso 1 1 calc R . .
C49 C 0.3350(4) -0.1317(3) -0.00053(13) 0.0321(12) Uani 1 1 d . . .
H49 H 0.3134 -0.1845 0.0008 0.039 Uiso 1 1 calc R . .
C50 C 0.3405(4) -0.0948(3) -0.03290(14) 0.0365(13) Uani 1 1 d . . .
H50 H 0.3230 -0.1219 -0.0539 0.044 Uiso 1 1 calc R . .
C51 C 0.3715(4) -0.0185(3) -0.03424(13) 0.0322(13) Uani 1 1 d . . .
H51 H 0.3735 0.0074 -0.0564 0.039 Uiso 1 1 calc R . .
C52 C 0.3999(4) 0.0215(3) -0.00394(11) 0.0267(10) Uani 1 1 d . . .
H52 H 0.4232 0.0738 -0.0057 0.032 Uiso 1 1 calc R . .
C53 C 1.1108(5) -0.0035(4) -0.00581(17) 0.0557(17) Uani 1 1 d . . .
H53A H 1.1698 0.0134 0.0095 0.067 Uiso 1 1 calc R . .
H53B H 1.1359 -0.0473 -0.0205 0.067 Uiso 1 1 calc R . .
C54 C 1.0794(5) 0.0610(4) -0.02877(17) 0.0598(19) Uani 1 1 d . . .
H54A H 1.0602 0.1067 -0.0143 0.072 Uiso 1 1 calc R . .
H54B H 1.1388 0.0757 -0.0443 0.072 Uiso 1 1 calc R . .
C55 C 0.9493(6) 0.0966(4) -0.07092(17) 0.061(2) Uani 1 1 d . . .
H55A H 0.9970 0.1075 -0.0910 0.074 Uiso 1 1 calc R . .
H55B H 0.9406 0.1450 -0.0571 0.074 Uiso 1 1 calc R . .
C56 C 0.8449(6) 0.0696(5) -0.08423(17) 0.067(2) Uani 1 1 d . . .
H56A H 0.8085 0.1119 -0.0971 0.080 Uiso 1 1 calc R . .
H56B H 0.8538 0.0249 -0.1004 0.080 Uiso 1 1 calc R . .
C57 C 0.6761(5) 0.0405(4) -0.06113(17) 0.0614(18) Uani 1 1 d . . .
H57A H 0.6507 0.0889 -0.0724 0.074 Uiso 1 1 calc R . .
H57B H 0.6391 0.0350 -0.0383 0.074 Uiso 1 1 calc R . .
C58 C 0.6475(6) -0.0268(4) -0.08420(17) 0.064(2) Uani 1 1 d . . .
H58A H 0.5701 -0.0275 -0.0874 0.077 Uiso 1 1 calc R . .
H58B H 0.6798 -0.0191 -0.1077 0.077 Uiso 1 1 calc R . .
C59 C 0.6804(6) -0.1607(4) -0.09817(16) 0.0592(18) Uani 1 1 d . . .
H59A H 0.7253 -0.1425 -0.1179 0.071 Uiso 1 1 calc R . .
H59B H 0.6077 -0.1660 -0.1073 0.071 Uiso 1 1 calc R . .
C60 C 0.7186(5) -0.2393(4) -0.08658(17) 0.0530(17) Uani 1 1 d . . .
H60A H 0.6619 -0.2648 -0.0729 0.064 Uiso 1 1 calc R . .
H60B H 0.7315 -0.2713 -0.1079 0.064 Uiso 1 1 calc R . .
C61 C 0.9001(6) -0.2038(5) -0.08239(16) 0.070(2) Uani 1 1 d . . .
H61A H 0.9209 -0.2344 -0.1034 0.084 Uiso 1 1 calc R . .
H61B H 0.8813 -0.1507 -0.0903 0.084 Uiso 1 1 calc R . .
C62 C 0.9828(7) -0.2004(6) -0.0588(2) 0.100(3) Uani 1 1 d . . .
H62A H 1.0462 -0.1808 -0.0711 0.121 Uiso 1 1 calc R . .
H62B H 0.9985 -0.2535 -0.0502 0.121 Uiso 1 1 calc R . .
C63 C 1.0390(6) -0.1662(4) -0.0037(2) 0.069(2) Uani 1 1 d . . .
H63A H 1.1094 -0.1607 -0.0146 0.083 Uiso 1 1 calc R . .
H63B H 1.0317 -0.2203 0.0049 0.083 Uiso 1 1 calc R . .
C64 C 1.0294(5) -0.1116(4) 0.02653(16) 0.0537(17) Uani 1 1 d . . .
H64A H 0.9660 -0.1256 0.0403 0.064 Uiso 1 1 calc R . .
H64B H 1.0914 -0.1184 0.0421 0.064 Uiso 1 1 calc R . .
C65 C 1.0100(5) 0.0201(4) 0.04770(16) 0.0577(19) Uani 1 1 d . . .
H65A H 1.0535 -0.0009 0.0672 0.069 Uiso 1 1 calc R . .
H65B H 1.0360 0.0729 0.0421 0.069 Uiso 1 1 calc R . .
C66 C 0.8997(5) 0.0250(4) 0.05931(13) 0.0503(16) Uani 1 1 d . . .
H66A H 0.8739 -0.0269 0.0664 0.060 Uiso 1 1 calc R . .
H66B H 0.8936 0.0605 0.0798 0.060 Uiso 1 1 calc R . .
C67 C 0.7285(5) 0.0482(4) 0.03595(15) 0.0459(14) Uani 1 1 d . . .
H67A H 0.6917 0.0811 0.0184 0.055 Uiso 1 1 calc R . .
H67B H 0.7108 0.0678 0.0598 0.055 Uiso 1 1 calc R . .
C68 C 0.6918(4) -0.0344(4) 0.03239(14) 0.0440(14) Uani 1 1 d . . .
H68A H 0.7066 -0.0633 0.0544 0.053 Uiso 1 1 calc R . .
H68B H 0.6149 -0.0357 0.0281 0.053 Uiso 1 1 calc R . .
C69 C 0.6989(4) -0.1406(3) -0.00755(14) 0.0389(13) Uani 1 1 d . . .
H69A H 0.6597 -0.1641 0.0123 0.047 Uiso 1 1 calc R . .
H69B H 0.7543 -0.1776 -0.0151 0.047 Uiso 1 1 calc R . .
C70 C 0.6240(4) -0.1248(4) -0.03817(15) 0.0472(15) Uani 1 1 d . . .
H70A H 0.5822 -0.1722 -0.0430 0.057 Uiso 1 1 calc R . .
H70B H 0.5745 -0.0830 -0.0314 0.057 Uiso 1 1 calc R . .
C71 C 0.3569(6) 0.0488(4) 0.20150(14) 0.0591(18) Uani 1 1 d . . .
H71A H 0.3933 0.0655 0.1797 0.071 Uiso 1 1 calc R . .
H71B H 0.3481 -0.0083 0.2006 0.071 Uiso 1 1 calc R . .
C72 C 0.2540(6) 0.0856(4) 0.20335(16) 0.063(2) Uani 1 1 d . . .
H72A H 0.2614 0.1427 0.2018 0.075 Uiso 1 1 calc R . .
H72B H 0.2092 0.0678 0.1835 0.075 Uiso 1 1 calc R . .
C73 C 0.1079(5) 0.0975(3) 0.24181(16) 0.0508(16) Uani 1 1 d . . .
H73A H 0.0552 0.0735 0.2259 0.061 Uiso 1 1 calc R . .
H73B H 0.1097 0.1541 0.2371 0.061 Uiso 1 1 calc R . .
C74 C 0.0796(4) 0.0835(4) 0.27835(17) 0.0509(17) Uani 1 1 d . . .
H74A H 0.0118 0.1090 0.2839 0.061 Uiso 1 1 calc R . .
H74B H 0.0720 0.0270 0.2827 0.061 Uiso 1 1 calc R . .
C75 C 0.1307(5) 0.1336(4) 0.33490(17) 0.0624(19) Uani 1 1 d . . .
H75A H 0.0677 0.1674 0.3339 0.075 Uiso 1 1 calc R . .
H75B H 0.1881 0.1639 0.3461 0.075 Uiso 1 1 calc R . .
C76 C 0.1066(6) 0.0654(4) 0.35757(17) 0.0668(19) Uani 1 1 d . . .
H76A H 0.0900 0.0839 0.3817 0.080 Uiso 1 1 calc R . .
H76B H 0.0431 0.0391 0.3482 0.080 Uiso 1 1 calc R . .
C77 C 0.1575(5) -0.0695(4) 0.36684(16) 0.0554(16) Uani 1 1 d . . .
H77A H 0.1055 -0.0687 0.3863 0.066 Uiso 1 1 calc R . .
H77B H 0.2188 -0.1006 0.3747 0.066 Uiso 1 1 calc R . .
C78 C 0.1086(5) -0.1081(4) 0.33492(15) 0.0557(16) Uani 1 1 d . . .
H78A H 0.0928 -0.1630 0.3406 0.067 Uiso 1 1 calc R . .
H78B H 0.0412 -0.0819 0.3293 0.067 Uiso 1 1 calc R . .
C79 C 0.2676(5) -0.1487(3) 0.30876(16) 0.0448(15) Uani 1 1 d . . .
H79A H 0.2495 -0.2040 0.3126 0.054 Uiso 1 1 calc R . .
H79B H 0.3077 -0.1299 0.3295 0.054 Uiso 1 1 calc R . .
C80 C 0.3323(5) -0.1403(3) 0.27593(16) 0.0462(15) Uani 1 1 d . . .
H80A H 0.3858 -0.1820 0.2751 0.055 Uiso 1 1 calc R . .
H80B H 0.2862 -0.1460 0.2550 0.055 Uiso 1 1 calc R . .
C81 C 0.4641(5) -0.0667(4) 0.24848(15) 0.0453(15) Uani 1 1 d . . .
H81A H 0.4354 -0.0884 0.2263 0.054 Uiso 1 1 calc R . .
H81B H 0.5227 -0.1005 0.2563 0.054 Uiso 1 1 calc R . .
C82 C 0.5049(5) 0.0135(4) 0.24181(17) 0.0515(17) Uani 1 1 d . . .
H82A H 0.5430 0.0315 0.2631 0.062 Uiso 1 1 calc R . .
H82B H 0.5561 0.0114 0.2221 0.062 Uiso 1 1 calc R . .
C83 C 0.4678(7) 0.1477(4) 0.22818(19) 0.073(2) Uani 1 1 d . . .
H83A H 0.4196 0.1794 0.2135 0.087 Uiso 1 1 calc R . .
H83B H 0.5358 0.1432 0.2156 0.087 Uiso 1 1 calc R . .
C84 C 0.4849(6) 0.1870(4) 0.26284(18) 0.069(2) Uani 1 1 d . . .
H84A H 0.5336 0.1565 0.2778 0.083 Uiso 1 1 calc R . .
H84B H 0.5149 0.2396 0.2593 0.083 Uiso 1 1 calc R . .
C85 C 0.3818(6) 0.2201(3) 0.31375(14) 0.0516(17) Uani 1 1 d . . .
H85A H 0.3089 0.2342 0.3206 0.062 Uiso 1 1 calc R . .
H85B H 0.4255 0.2676 0.3150 0.062 Uiso 1 1 calc R . .
C86 C 0.4239(5) 0.1606(3) 0.33923(15) 0.0516(17) Uani 1 1 d . . .
H86A H 0.5017 0.1589 0.3380 0.062 Uiso 1 1 calc R . .
H86B H 0.4030 0.1741 0.3636 0.062 Uiso 1 1 calc R . .
C87 C 0.3844(5) 0.0317(3) 0.35787(14) 0.0484(15) Uani 1 1 d . . .
H87A H 0.4456 0.0430 0.3732 0.058 Uiso 1 1 calc R . .
H87B H 0.3937 -0.0211 0.3480 0.058 Uiso 1 1 calc R . .
C88 C 0.2846(5) 0.0342(4) 0.37966(14) 0.0556(16) Uani 1 1 d . . .
H88A H 0.2932 0.0002 0.4005 0.067 Uiso 1 1 calc R . .
H88B H 0.2733 0.0879 0.3882 0.067 Uiso 1 1 calc R . .
Li1 Li 0.8760(7) -0.0139(5) -0.0158(2) 0.039(2) Uani 1 1 d . . .
Li2 Li 0.3120(7) 0.0762(5) 0.2787(2) 0.036(2) Uani 1 1 d . . .

loop_
  _atom_site_aniso_label
  _atom_site_aniso_U_11
  _atom_site_aniso_U_22
  _atom_site_aniso_U_33
  _atom_site_aniso_U_23
  _atom_site_aniso_U_13
  _atom_site_aniso_U_12
Pt1 0.02011(7) 0.02145(8) 0.01710(8) 0.00024(7) -0.00294(7) -0.00104(8)
P1 0.0236(6) 0.0224(6) 0.0198(6) 0.0003(5) -0.0028(5) -0.0010(5)
P2 0.0239(6) 0.0220(7) 0.0185(6) -0.0006(5) -0.0027(5) 0.0001(5)
P3 0.0254(6) 0.0231(7) 0.0184(6) -0.0009(5) -0.0038(5) -0.0008(5)
P4 0.0223(5) 0.0214(6) 0.0183(6) -0.0003(6) -0.0016(4) -0.0015(6)
O1 0.062(3) 0.044(3) 0.052(2) 0.011(2) 0.006(2) -0.010(2)
O2 0.069(3) 0.042(3) 0.043(2) 0.010(2) -0.008(2) 0.001(2)
O3 0.056(3) 0.045(3) 0.045(2) -0.0070(19) 0.011(2) -0.007(2)
O4 0.057(3) 0.096(4) 0.044(3) -0.029(3) 0.018(2) -0.029(3)
O5 0.049(2) 0.038(2) 0.033(2) 0.0010(17) 0.0081(17) -0.0005(18)
O6 0.0319(19) 0.035(2) 0.031(2) -0.0049(16) 0.0108(15) -0.0039(15)
O7 0.066(3) 0.047(3) 0.031(2) 0.0036(17) -0.010(2) 0.014(2)
O8 0.034(2) 0.064(3) 0.041(2) 0.000(2) -0.0020(18) -0.0015(19)
O9 0.043(2) 0.053(3) 0.040(2) 0.0052(19) -0.0032(18) 0.0068(19)
O10 0.040(2) 0.044(2) 0.035(2) -0.0063(16) 0.0092(17) 0.0003(18)
O11 0.051(3) 0.035(2) 0.043(2) -0.0063(17) -0.0017(19) -0.0045(19)
O12 0.048(2) 0.035(2) 0.032(2) -0.0061(16) -0.0051(17) -0.0045(17)
N1 0.044(3) 0.049(3) 0.031(2) -0.004(2) -0.004(2) 0.004(2)
N2 0.047(3) 0.044(3) 0.038(3) -0.001(2) -0.009(2) 0.000(2)
N3 0.066(4) 0.036(3) 0.041(3) -0.001(2) 0.020(3) -0.001(2)
N4 0.053(3) 0.064(4) 0.032(3) -0.002(2) 0.007(2) -0.002(3)
C1 0.023(2) 0.024(3) 0.018(2) -0.0016(19) -0.0005(17) -0.0002(19)
C2 0.022(2) 0.027(3) 0.016(2) 0.0047(18) 0.0010(18) -0.0005(18)
C3 0.024(2) 0.028(3) 0.016(2) 0.0007(19) 0.0008(17) -0.0023(19)
C4 0.022(2) 0.027(3) 0.014(2) 0.0040(18) -0.0020(16) 0.0012(17)
C5 0.032(3) 0.022(3) 0.019(2) -0.0051(18) -0.0012(19) -0.006(2)
C6 0.032(3) 0.040(3) 0.023(3) 0.002(2) -0.004(2) -0.007(2)
C7 0.028(3) 0.061(4) 0.040(3) -0.002(3) 0.001(3) -0.008(2)
C8 0.042(3) 0.053(4) 0.035(3) -0.004(3) 0.011(3) -0.019(3)
C9 0.055(3) 0.040(3) 0.028(3) 0.005(2) 0.010(3) -0.012(3)
C10 0.033(3) 0.033(3) 0.037(3) 0.000(2) 0.004(3) -0.006(2)
C11 0.026(2) 0.020(2) 0.022(2) 0.000(2) 0.001(2) 0.0001(17)
C12 0.032(2) 0.031(3) 0.028(3) -0.007(2) 0.000(2) -0.005(2)
C13 0.033(3) 0.040(3) 0.040(3) -0.009(2) 0.007(2) -0.001(2)
C14 0.043(3) 0.025(3) 0.034(3) -0.004(2) 0.012(2) 0.003(2)
C15 0.047(3) 0.023(3) 0.025(3) -0.002(2) 0.001(2) 0.001(2)
C16 0.031(3) 0.030(3) 0.029(3) 0.002(2) -0.007(2) 0.007(2)
C17 0.023(2) 0.028(3) 0.022(3) -0.001(2) -0.004(2) 0.001(2)
C18 0.032(3) 0.029(3) 0.025(3) -0.002(2) -0.005(2) 0.001(2)
C19 0.038(3) 0.026(3) 0.039(3) -0.010(2) -0.006(2) -0.001(2)
C20 0.042(3) 0.040(3) 0.026(3) -0.014(2) -0.003(2) 0.010(3)
C21 0.043(3) 0.037(3) 0.023(3) -0.001(2) -0.001(2) 0.004(3)
C22 0.035(3) 0.028(3) 0.027(3) -0.003(2) -0.005(2) 0.003(2)
C23 0.032(3) 0.024(3) 0.018(2) -0.0052(19) -0.003(2) 0.007(2)
C24 0.031(3) 0.028(3) 0.033(3) -0.002(2) -0.009(2) -0.003(2)
C25 0.040(3) 0.035(3) 0.048(3) -0.007(3) -0.020(3) 0.013(3)
C26 0.053(4) 0.040(3) 0.039(3) 0.007(3) -0.012(3) 0.016(3)
C27 0.047(3) 0.027(3) 0.037(3) 0.008(2) -0.003(3) 0.006(2)
C28 0.029(3) 0.027(3) 0.027(3) 0.003(2) 0.001(2) -0.001(2)
C29 0.030(2) 0.021(2) 0.014(3) 0.0054(19) -0.0009(19) 0.0004(19)
C30 0.034(3) 0.031(3) 0.026(3) 0.003(2) -0.004(2) -0.006(2)
C31 0.056(3) 0.028(3) 0.019(3) -0.005(2) -0.005(2) 0.002(2)
C32 0.045(3) 0.030(3) 0.033(3) -0.003(2) 0.005(3) 0.006(2)
C33 0.034(3) 0.042(4) 0.031(3) -0.001(3) 0.003(2) 0.006(3)
C34 0.032(2) 0.031(3) 0.030(3) 0.001(3) 0.003(3) -0.005(2)
C35 0.029(3) 0.023(2) 0.021(3) -0.0050(17) -0.0024(18) -0.0034(18)
C36 0.031(2) 0.029(3) 0.025(2) 0.000(2) -0.002(2) -0.007(2)
C37 0.047(3) 0.033(3) 0.027(3) 0.000(2) -0.003(2) -0.015(3)
C38 0.043(3) 0.045(3) 0.030(3) -0.002(3) 0.013(3) -0.014(3)
C39 0.027(2) 0.037(3) 0.042(3) -0.008(2) 0.009(2) -0.005(2)
C40 0.034(2) 0.029(3) 0.022(2) -0.002(2) 0.0023(19) -0.003(2)
C41 0.034(3) 0.023(3) 0.019(3) -0.0053(19) -0.002(2) 0.000(2)
C42 0.045(3) 0.031(3) 0.034(3) 0.004(2) -0.009(2) -0.008(2)
C43 0.066(5) 0.036(4) 0.041(3) 0.008(3) -0.022(3) -0.016(3)
C44 0.080(5) 0.028(3) 0.060(4) 0.008(3) -0.036(4) 0.008(3)
C45 0.041(3) 0.039(4) 0.058(4) -0.001(3) -0.020(3) 0.012(3)
C46 0.042(3) 0.028(3) 0.027(3) -0.002(2) -0.006(2) 0.002(2)
C47 0.021(2) 0.024(2) 0.020(2) 0.0022(17) 0.000(2) 0.003(2)
C48 0.027(2) 0.031(3) 0.026(3) -0.001(2) -0.003(2) -0.004(2)
C49 0.032(3) 0.030(3) 0.034(3) -0.004(2) -0.004(2) 0.000(2)
C50 0.038(3) 0.045(4) 0.026(3) -0.014(2) -0.007(2) 0.000(3)
C51 0.037(3) 0.039(3) 0.020(3) -0.007(2) -0.002(2) 0.004(2)
C52 0.028(2) 0.026(3) 0.026(2) -0.0047(18) -0.002(2) 0.003(2)
C53 0.035(3) 0.064(4) 0.068(4) -0.007(3) 0.007(3) -0.008(3)
C54 0.057(4) 0.069(5) 0.053(4) -0.011(3) 0.013(3) -0.020(4)
C55 0.099(6) 0.046(4) 0.039(4) 0.017(3) 0.019(4) -0.009(4)
C56 0.084(5) 0.077(6) 0.040(4) 0.022(3) 0.013(4) 0.017(4)
C57 0.067(4) 0.054(4) 0.063(4) 0.006(4) -0.015(3) 0.017(4)
C58 0.070(4) 0.074(6) 0.048(4) 0.002(4) -0.032(3) 0.008(4)
C59 0.069(5) 0.069(5) 0.040(4) -0.004(3) -0.010(3) -0.010(4)
C60 0.054(4) 0.056(4) 0.049(4) -0.008(3) 0.002(3) -0.012(3)
C61 0.059(4) 0.109(6) 0.043(4) -0.021(4) 0.019(4) -0.018(5)
C62 0.068(6) 0.157(10) 0.077(6) -0.034(6) 0.034(5) -0.042(6)
C63 0.051(4) 0.048(5) 0.109(7) -0.010(4) 0.003(4) -0.005(3)
C64 0.059(4) 0.053(4) 0.049(4) 0.011(3) -0.007(3) 0.009(3)
C65 0.049(4) 0.080(6) 0.044(4) -0.015(3) -0.012(3) -0.002(3)
C66 0.056(3) 0.074(5) 0.021(3) -0.003(3) -0.005(3) -0.019(4)
C67 0.054(4) 0.040(4) 0.043(3) -0.006(3) 0.008(3) 0.006(3)
C68 0.040(3) 0.054(4) 0.038(3) -0.004(3) 0.013(2) 0.004(3)
C69 0.038(3) 0.037(3) 0.041(3) 0.001(3) 0.011(3) -0.007(3)
C70 0.036(3) 0.052(4) 0.054(4) -0.006(3) 0.001(3) -0.009(3)
C71 0.104(5) 0.049(4) 0.025(3) 0.002(3) 0.006(3) 0.003(4)
C72 0.108(6) 0.048(4) 0.033(4) 0.001(3) -0.016(4) 0.000(4)
C73 0.049(4) 0.042(3) 0.062(4) 0.016(3) -0.032(3) -0.015(3)
C74 0.031(3) 0.048(4) 0.075(5) -0.007(3) -0.009(3) -0.003(3)
C75 0.054(4) 0.077(5) 0.056(4) -0.011(4) 0.011(3) 0.022(4)
C76 0.059(4) 0.088(6) 0.053(4) -0.005(4) 0.014(4) 0.007(4)
C77 0.065(4) 0.064(4) 0.038(3) 0.002(3) 0.010(3) -0.011(3)
C78 0.052(4) 0.073(5) 0.043(4) 0.008(3) 0.007(3) -0.003(4)
C79 0.051(4) 0.024(3) 0.059(4) -0.007(3) -0.003(3) -0.002(3)
C80 0.052(4) 0.038(4) 0.049(4) -0.015(3) -0.006(3) 0.001(3)
C81 0.042(3) 0.054(4) 0.040(3) -0.009(3) 0.011(3) 0.012(3)
C82 0.041(3) 0.054(4) 0.060(4) -0.009(3) 0.025(3) 0.004(3)
C83 0.093(6) 0.060(5) 0.065(5) 0.006(4) 0.046(4) -0.017(4)
C84 0.073(5) 0.068(5) 0.066(5) -0.005(4) 0.013(4) -0.051(4)
C85 0.085(5) 0.034(3) 0.035(3) -0.010(2) -0.007(3) -0.003(3)
C86 0.061(4) 0.052(4) 0.042(4) -0.009(3) -0.012(3) -0.012(3)
C87 0.060(4) 0.038(3) 0.047(3) -0.001(3) -0.014(3) 0.006(3)
C88 0.076(4) 0.062(4) 0.029(3) -0.001(3) 0.002(3) -0.011(4)
Li1 0.044(6) 0.044(6) 0.028(5) 0.006(4) 0.001(4) -0.007(4)
Li2 0.034(5) 0.045(6) 0.029(5) -0.010(4) 0.002(4) -0.002(4)

_geom_special_details
;
  All esds (except the esd in the dihedral angle between two l.s. planes)
  are estimated using the full covariance matrix.  The cell esds are taken
  into account individually in the estimation of esds in distances, angles
  and torsion angles; correlations between esds in cell parameters are only
  used when they are defined by crystal symmetry.  An approximate (isotropic)
  treatment of cell esds is used for estimating esds involving l.s. planes.
;

loop_
  _geom_bond_atom_site_label_1
  _geom_bond_atom_site_label_2
  _geom_bond_distance
  _geom_bond_site_symmetry_2
  _geom_bond_publ_flag
Pt1 P2 2.3145(12) . ?
Pt1 P3 2.3187(12) . ?
Pt1 P1 2.3468(12) . ?
Pt1 P4 2.3491(12) . ?
P1 C5 1.839(5) . ?
P1 C1 1.862(5) . ?
P2 C2 1.826(5) . ?
P2 C11 1.840(5) . ?
P3 C3 1.807(5) . ?
P3 C29 1.833(5) . ?
P4 C35 1.846(4) . ?
P4 C4 1.858(4) . ?
O1 C55 1.407(8) . ?
O1 C54 1.421(7) . ?
O1 Li1 2.141(9) . ?
O2 C56 1.393(7) . ?
O2 C57 1.438(7) . ?
O2 Li1 2.135(10) . ?
O3 C61 1.420(8) . ?
O3 C60 1.427(7) . ?
O4 C63 1.396(8) . ?
O4 C62 1.449(9) . ?
O4 Li1 2.638(11) . ?
O5 C66 1.417(6) . ?
O5 C67 1.430(6) . ?
O5 Li1 2.154(10) . ?
O6 C68 1.427(6) . ?
O6 C69 1.427(6) . ?
O6 Li1 2.040(9) . ?
O7 C72 1.407(7) . ?
O7 C73 1.409(8) . ?
O7 Li2 2.104(9) . ?
O8 C74 1.423(7) . ?
O8 C75 1.424(7) . ?
O8 Li2 2.175(10) . ?
O9 C79 1.386(7) . ?
O9 C78 1.442(7) . ?
O10 C81 1.423(6) . ?
O10 C80 1.437(7) . ?
O10 Li2 2.617(10) . ?
O11 C85 1.405(6) . ?
O11 C84 1.443(8) . ?
O11 Li2 2.180(10) . ?
O12 C86 1.426(6) . ?
O12 C87 1.435(6) . ?
O12 Li2 2.125(9) . ?
N1 C64 1.462(8) . ?
N1 C65 1.471(7) . ?
N1 C53 1.479(7) . ?
N1 Li1 2.237(10) . ?
N2 C58 1.453(8) . ?
N2 C59 1.458(7) . ?
N2 C70 1.476(7) . ?
N3 C83 1.461(8) . ?
N3 C82 1.468(8) . ?
N3 C71 1.506(8) . ?
N3 Li2 2.230(10) . ?
N4 C77 1.450(7) . ?
N4 C76 1.453(8) . ?
N4 C88 1.465(7) . ?
C1 C2 1.357(6) . ?
C1 C17 1.495(6) . ?
C2 C23 1.482(6) . ?
C3 C4 1.374(7) . ?
C3 C41 1.487(6) . ?
C4 C47 1.496(6) . ?
C5 C6 1.407(7) . ?
C5 C10 1.408(7) . ?
C6 C7 1.380(7) . ?
C6 H6 0.9500 . ?
C7 C8 1.381(8) . ?
C7 H7 0.9500 . ?
C8 C9 1.369(8) . ?
C8 H8 0.9500 . ?
C9 C10 1.392(7) . ?
C9 H9 0.9500 . ?
C10 H10 0.9500 . ?
C11 C16 1.391(7) . ?
C11 C12 1.401(6) . ?
C12 C13 1.377(7) . ?
C12 H12 0.9500 . ?
C13 C14 1.387(7) . ?
C13 H13 0.9500 . ?
C14 C15 1.374(7) . ?
C14 H14 0.9500 . ?
C15 C16 1.409(7) . ?
C15 H15 0.9500 . ?
C16 H16 0.9500 . ?
C17 C18 1.371(7) . ?
C17 C22 1.411(7) . ?
C18 C19 1.404(7) . ?
C18 H18 0.9500 . ?
C19 C20 1.385(7) . ?
C19 H19 0.9500 . ?
C20 C21 1.360(7) . ?
C20 H20 0.9500 . ?
C21 C22 1.378(7) . ?
C21 H21 0.9500 . ?
C22 H22 0.9500 . ?
C23 C24 1.396(7) . ?
C23 C28 1.398(7) . ?
C24 C25 1.384(7) . ?
C24 H24 0.9500 . ?
C25 C26 1.375(8) . ?
C25 H25 0.9500 . ?
C26 C27 1.368(8) . ?
C26 H26 0.9500 . ?
C27 C28 1.377(7) . ?
C27 H27 0.9500 . ?
C28 H28 0.9500 . ?
C29 C34 1.400(6) . ?
C29 C30 1.404(7) . ?
C30 C31 1.398(7) . ?
C30 H30 0.9500 . ?
C31 C32 1.366(7) . ?
C31 H31 0.9500 . ?
C32 C33 1.378(8) . ?
C32 H32 0.9500 . ?
C33 C34 1.388(7) . ?
C33 H33 0.9500 . ?
C34 H34 0.9500 . ?
C35 C40 1.392(6) . ?
C35 C36 1.412(6) . ?
C36 C37 1.374(7) . ?
C36 H36 0.9500 . ?
C37 C38 1.382(8) . ?
C37 H37 0.9500 . ?
C38 C39 1.376(7) . ?
C38 H38 0.9500 . ?
C39 C40 1.392(6) . ?
C39 H39 0.9500 . ?
C40 H40 0.9500 . ?
C41 C46 1.386(7) . ?
C41 C42 1.392(7) . ?
C42 C43 1.391(8) . ?
C42 H42 0.9500 . ?
C43 C44 1.381(9) . ?
C43 H43 0.9500 . ?
C44 C45 1.368(9) . ?
C44 H44 0.9500 . ?
C45 C46 1.387(7) . ?
C45 H45 0.9500 . ?
C46 H46 0.9500 . ?
C47 C48 1.389(6) . ?
C47 C52 1.397(6) . ?
C48 C49 1.399(7) . ?
C48 H48 0.9500 . ?
C49 C50 1.383(7) . ?
C49 H49 0.9500 . ?
C50 C51 1.372(7) . ?
C50 H50 0.9500 . ?
C51 C52 1.387(6) . ?
C51 H51 0.9500 . ?
C52 H52 0.9500 . ?
C53 C54 1.465(9) . ?
C53 H53A 0.9900 . ?
C53 H53B 0.9900 . ?
C54 H54A 0.9900 . ?
C54 H54B 0.9900 . ?
C55 C56 1.492(10) . ?
C55 H55A 0.9900 . ?
C55 H55B 0.9900 . ?
C56 H56A 0.9900 . ?
C56 H56B 0.9900 . ?
C57 C58 1.497(9) . ?
C57 H57A 0.9900 . ?
C57 H57B 0.9900 . ?
C58 H58A 0.9900 . ?
C58 H58B 0.9900 . ?
C59 C60 1.504(9) . ?
C59 H59A 0.9900 . ?
C59 H59B 0.9900 . ?
C60 H60A 0.9900 . ?
C60 H60B 0.9900 . ?
C61 C62 1.381(10) . ?
C61 H61A 0.9900 . ?
C61 H61B 0.9900 . ?
C62 H62A 0.9900 . ?
C62 H62B 0.9900 . ?
C63 C64 1.485(9) . ?
C63 H63A 0.9900 . ?
C63 H63B 0.9900 . ?
C64 H64A 0.9900 . ?
C64 H64B 0.9900 . ?
C65 C66 1.469(8) . ?
C65 H65A 0.9900 . ?
C65 H65B 0.9900 . ?
C66 H66A 0.9900 . ?
C66 H66B 0.9900 . ?
C67 C68 1.503(8) . ?
C67 H67A 0.9900 . ?
C67 H67B 0.9900 . ?
C68 H68A 0.9900 . ?
C68 H68B 0.9900 . ?
C69 C70 1.525(8) . ?
C69 H69A 0.9900 . ?
C69 H69B 0.9900 . ?
C70 H70A 0.9900 . ?
C70 H70B 0.9900 . ?
C71 C72 1.452(9) . ?
C71 H71A 0.9900 . ?
C71 H71B 0.9900 . ?
C72 H72A 0.9900 . ?
C72 H72B 0.9900 . ?
C73 C74 1.450(8) . ?
C73 H73A 0.9900 . ?
C73 H73B 0.9900 . ?
C74 H74A 0.9900 . ?
C74 H74B 0.9900 . ?
C75 C76 1.488(9) . ?
C75 H75A 0.9900 . ?
C75 H75B 0.9900 . ?
C76 H76A 0.9900 . ?
C76 H76B 0.9900 . ?
C77 C78 1.513(9) . ?
C77 H77A 0.9900 . ?
C77 H77B 0.9900 . ?
C78 H78A 0.9900 . ?
C78 H78B 0.9900 . ?
C79 C80 1.498(8) . ?
C79 H79A 0.9900 . ?
C79 H79B 0.9900 . ?
C80 H80A 0.9900 . ?
C80 H80B 0.9900 . ?
C81 C82 1.496(8) . ?
C81 H81A 0.9900 . ?
C81 H81B 0.9900 . ?
C82 H82A 0.9900 . ?
C82 H82B 0.9900 . ?
C83 C84 1.494(9) . ?
C83 H83A 0.9900 . ?
C83 H83B 0.9900 . ?
C84 H84A 0.9900 . ?
C84 H84B 0.9900 . ?
C85 C86 1.505(8) . ?
C85 H85A 0.9900 . ?
C85 H85B 0.9900 . ?
C86 H86A 0.9900 . ?
C86 H86B 0.9900 . ?
C87 C88 1.512(8) . ?
C87 H87A 0.9900 . ?
C87 H87B 0.9900 . ?
C88 H88A 0.9900 . ?
C88 H88B 0.9900 . ?

loop_
  _geom_angle_atom_site_label_1
  _geom_angle_atom_site_label_2
  _geom_angle_atom_site_label_3
  _geom_angle
  _geom_angle_site_symmetry_1
  _geom_angle_site_symmetry_3
  _geom_angle_publ_flag
P2 Pt1 P3 178.71(5) . . ?
P2 Pt1 P1 86.26(4) . . ?
P3 Pt1 P1 94.17(4) . . ?
P2 Pt1 P4 93.02(4) . . ?
P3 Pt1 P4 86.57(4) . . ?
P1 Pt1 P4 178.76(4) . . ?
C5 P1 C1 100.1(2) . . ?
C5 P1 Pt1 106.91(14) . . ?
C1 P1 Pt1 105.35(15) . . ?
C2 P2 C11 104.0(2) . . ?
C2 P2 Pt1 107.90(15) . . ?
C11 P2 Pt1 113.17(16) . . ?
C3 P3 C29 103.7(2) . . ?
C3 P3 Pt1 107.63(16) . . ?
C29 P3 Pt1 113.85(15) . . ?
C35 P4 C4 100.1(2) . . ?
C35 P4 Pt1 106.17(14) . . ?
C4 P4 Pt1 105.24(15) . . ?
C55 O1 C54 114.5(5) . . ?
C55 O1 Li1 112.4(5) . . ?
C54 O1 Li1 108.9(4) . . ?
C56 O2 C57 113.5(5) . . ?
C56 O2 Li1 114.4(5) . . ?
C57 O2 Li1 126.4(5) . . ?
C61 O3 C60 114.1(5) . . ?
C63 O4 C62 106.7(6) . . ?
C63 O4 Li1 109.5(4) . . ?
C62 O4 Li1 138.6(6) . . ?
C66 O5 C67 113.4(4) . . ?
C66 O5 Li1 108.9(4) . . ?
C67 O5 Li1 107.0(4) . . ?
C68 O6 C69 112.7(4) . . ?
C68 O6 Li1 117.9(4) . . ?
C69 O6 Li1 129.5(4) . . ?
C72 O7 C73 114.5(5) . . ?
C72 O7 Li2 113.0(5) . . ?
C73 O7 Li2 113.8(4) . . ?
C74 O8 C75 114.9(5) . . ?
C74 O8 Li2 108.5(4) . . ?
C75 O8 Li2 130.8(4) . . ?
C79 O9 C78 112.7(5) . . ?
C81 O10 C80 109.9(4) . . ?
C81 O10 Li2 107.3(4) . . ?
C80 O10 Li2 132.2(4) . . ?
C85 O11 C84 114.8(5) . . ?
C85 O11 Li2 108.6(4) . . ?
C84 O11 Li2 108.4(4) . . ?
C86 O12 C87 112.7(4) . . ?
C86 O12 Li2 117.9(4) . . ?
C87 O12 Li2 129.2(4) . . ?
C64 N1 C65 111.1(5) . . ?
C64 N1 C53 113.3(5) . . ?
C65 N1 C53 111.1(5) . . ?
C64 N1 Li1 108.2(4) . . ?
C65 N1 Li1 106.3(4) . . ?
C53 N1 Li1 106.4(4) . . ?
C58 N2 C59 111.2(5) . . ?
C58 N2 C70 113.2(5) . . ?
C59 N2 C70 114.1(5) . . ?
C83 N3 C82 111.0(6) . . ?
C83 N3 C71 109.9(5) . . ?
C82 N3 C71 114.2(5) . . ?
C83 N3 Li2 107.7(4) . . ?
C82 N3 Li2 107.7(4) . . ?
C71 N3 Li2 106.1(4) . . ?
C77 N4 C76 114.2(5) . . ?
C77 N4 C88 114.8(5) . . ?
C76 N4 C88 115.6(5) . . ?
C2 C1 C17 124.6(4) . . ?
C2 C1 P1 119.3(3) . . ?
C17 C1 P1 115.6(3) . . ?
C1 C2 C23 123.1(4) . . ?
C1 C2 P2 118.8(3) . . ?
C23 C2 P2 117.3(3) . . ?
C4 C3 C41 122.0(4) . . ?
C4 C3 P3 119.3(3) . . ?
C41 C3 P3 117.9(3) . . ?
C3 C4 C47 125.3(4) . . ?
C3 C4 P4 119.0(3) . . ?
C47 C4 P4 115.3(3) . . ?
C6 C5 C10 116.0(4) . . ?
C6 C5 P1 125.3(4) . . ?
C10 C5 P1 118.5(4) . . ?
C7 C6 C5 122.4(5) . . ?
C7 C6 H6 118.8 . . ?
C5 C6 H6 118.8 . . ?
C6 C7 C8 120.3(5) . . ?
C6 C7 H7 119.9 . . ?
C8 C7 H7 119.9 . . ?
C9 C8 C7 119.0(5) . . ?
C9 C8 H8 120.5 . . ?
C7 C8 H8 120.5 . . ?
C8 C9 C10 121.4(5) . . ?
C8 C9 H9 119.3 . . ?
C10 C9 H9 119.3 . . ?
C9 C10 C5 121.0(5) . . ?
C9 C10 H10 119.5 . . ?
C5 C10 H10 119.5 . . ?
C16 C11 C12 116.9(4) . . ?
C16 C11 P2 118.7(3) . . ?
C12 C11 P2 124.3(4) . . ?
C13 C12 C11 121.7(5) . . ?
C13 C12 H12 119.2 . . ?
C11 C12 H12 119.2 . . ?
C12 C13 C14 120.5(5) . . ?
C12 C13 H13 119.7 . . ?
C14 C13 H13 119.7 . . ?
C15 C14 C13 119.6(5) . . ?
C15 C14 H14 120.2 . . ?
C13 C14 H14 120.2 . . ?
C14 C15 C16 119.5(5) . . ?
C14 C15 H15 120.2 . . ?
C16 C15 H15 120.2 . . ?
C11 C16 C15 121.7(5) . . ?
C11 C16 H16 119.1 . . ?
C15 C16 H16 119.1 . . ?
C18 C17 C22 116.9(4) . . ?
C18 C17 C1 121.4(4) . . ?
C22 C17 C1 121.3(4) . . ?
C17 C18 C19 121.5(5) . . ?
C17 C18 H18 119.2 . . ?
C19 C18 H18 119.2 . . ?
C20 C19 C18 120.0(5) . . ?
C20 C19 H19 120.0 . . ?
C18 C19 H19 120.0 . . ?
C21 C20 C19 119.2(5) . . ?
C21 C20 H20 120.4 . . ?
C19 C20 H20 120.4 . . ?
C20 C21 C22 120.9(5) . . ?
C20 C21 H21 119.6 . . ?
C22 C21 H21 119.6 . . ?
C21 C22 C17 121.5(5) . . ?
C21 C22 H22 119.2 . . ?
C17 C22 H22 119.2 . . ?
C24 C23 C28 116.8(4) . . ?
C24 C23 C2 120.5(4) . . ?
C28 C23 C2 122.7(4) . . ?
C25 C24 C23 121.9(5) . . ?
C25 C24 H24 119.1 . . ?
C23 C24 H24 119.1 . . ?
C26 C25 C24 119.5(5) . . ?
C26 C25 H25 120.2 . . ?
C24 C25 H25 120.2 . . ?
C27 C26 C25 119.8(5) . . ?
C27 C26 H26 120.1 . . ?
C25 C26 H26 120.1 . . ?
C26 C27 C28 120.9(5) . . ?
C26 C27 H27 119.6 . . ?
C28 C27 H27 119.6 . . ?
C27 C28 C23 121.0(5) . . ?
C27 C28 H28 119.5 . . ?
C23 C28 H28 119.5 . . ?
C34 C29 C30 116.5(5) . . ?
C34 C29 P3 125.1(4) . . ?
C30 C29 P3 118.3(4) . . ?
C31 C30 C29 121.7(5) . . ?
C31 C30 H30 119.1 . . ?
C29 C30 H30 119.1 . . ?
C32 C31 C30 119.8(5) . . ?
C32 C31 H31 120.1 . . ?
C30 C31 H31 120.1 . . ?
C31 C32 C33 120.1(5) . . ?
C31 C32 H32 119.9 . . ?
C33 C32 H32 119.9 . . ?
C32 C33 C34 120.3(5) . . ?
C32 C33 H33 119.8 . . ?
C34 C33 H33 119.8 . . ?
C33 C34 C29 121.5(5) . . ?
C33 C34 H34 119.2 . . ?
C29 C34 H34 119.2 . . ?
C40 C35 C36 116.2(4) . . ?
C40 C35 P4 125.8(4) . . ?
C36 C35 P4 118.0(3) . . ?
C37 C36 C35 121.7(5) . . ?
C37 C36 H36 119.2 . . ?
C35 C36 H36 119.2 . . ?
C36 C37 C38 120.9(5) . . ?
C36 C37 H37 119.5 . . ?
C38 C37 H37 119.5 . . ?
C39 C38 C37 118.8(5) . . ?
C39 C38 H38 120.6 . . ?
C37 C38 H38 120.6 . . ?
C38 C39 C40 120.5(5) . . ?
C38 C39 H39 119.7 . . ?
C40 C39 H39 119.7 . . ?
C39 C40 C35 121.9(5) . . ?
C39 C40 H40 119.0 . . ?
C35 C40 H40 119.0 . . ?
C46 C41 C42 117.7(5) . . ?
C46 C41 C3 120.5(4) . . ?
C42 C41 C3 121.7(4) . . ?
C43 C42 C41 121.2(5) . . ?
C43 C42 H42 119.4 . . ?
C41 C42 H42 119.4 . . ?
C44 C43 C42 119.4(6) . . ?
C44 C43 H43 120.3 . . ?
C42 C43 H43 120.3 . . ?
C45 C44 C43 120.3(6) . . ?
C45 C44 H44 119.9 . . ?
C43 C44 H44 119.9 . . ?
C44 C45 C46 120.0(6) . . ?
C44 C45 H45 120.0 . . ?
C46 C45 H45 120.0 . . ?
C41 C46 C45 121.3(5) . . ?
C41 C46 H46 119.4 . . ?
C45 C46 H46 119.4 . . ?
C48 C47 C52 117.3(4) . . ?
C48 C47 C4 120.1(4) . . ?
C52 C47 C4 122.4(4) . . ?
C47 C48 C49 121.8(5) . . ?
C47 C48 H48 119.1 . . ?
C49 C48 H48 119.1 . . ?
C50 C49 C48 119.7(5) . . ?
C50 C49 H49 120.2 . . ?
C48 C49 H49 120.2 . . ?
C51 C50 C49 119.2(5) . . ?
C51 C50 H50 120.4 . . ?
C49 C50 H50 120.4 . . ?
C50 C51 C52 121.3(5) . . ?
C50 C51 H51 119.3 . . ?
C52 C51 H51 119.3 . . ?
C51 C52 C47 120.8(4) . . ?
C51 C52 H52 119.6 . . ?
C47 C52 H52 119.6 . . ?
C54 C53 N1 111.3(5) . . ?
C54 C53 H53A 109.4 . . ?
N1 C53 H53A 109.4 . . ?
C54 C53 H53B 109.4 . . ?
N1 C53 H53B 109.4 . . ?
H53A C53 H53B 108.0 . . ?
O1 C54 C53 109.1(5) . . ?
O1 C54 H54A 109.9 . . ?
C53 C54 H54A 109.9 . . ?
O1 C54 H54B 109.9 . . ?
C53 C54 H54B 109.9 . . ?
H54A C54 H54B 108.3 . . ?
O1 C55 C56 108.0(6) . . ?
O1 C55 H55A 110.1 . . ?
C56 C55 H55A 110.1 . . ?
O1 C55 H55B 110.1 . . ?
C56 C55 H55B 110.1 . . ?
H55A C55 H55B 108.4 . . ?
O2 C56 C55 106.1(5) . . ?
O2 C56 H56A 110.5 . . ?
C55 C56 H56A 110.5 . . ?
O2 C56 H56B 110.5 . . ?
C55 C56 H56B 110.5 . . ?
H56A C56 H56B 108.7 . . ?
O2 C57 C58 113.9(6) . . ?
O2 C57 H57A 108.8 . . ?
C58 C57 H57A 108.8 . . ?
O2 C57 H57B 108.8 . . ?
C58 C57 H57B 108.8 . . ?
H57A C57 H57B 107.7 . . ?
N2 C58 C57 114.2(5) . . ?
N2 C58 H58A 108.7 . . ?
C57 C58 H58A 108.7 . . ?
N2 C58 H58B 108.7 . . ?
C57 C58 H58B 108.7 . . ?
H58A C58 H58B 107.6 . . ?
N2 C59 C60 114.6(5) . . ?
N2 C59 H59A 108.6 . . ?
C60 C59 H59A 108.6 . . ?
N2 C59 H59B 108.6 . . ?
C60 C59 H59B 108.6 . . ?
H59A C59 H59B 107.6 . . ?
O3 C60 C59 115.3(5) . . ?
O3 C60 H60A 108.5 . . ?
C59 C60 H60A 108.5 . . ?
O3 C60 H60B 108.5 . . ?
C59 C60 H60B 108.5 . . ?
H60A C60 H60B 107.5 . . ?
C62 C61 O3 109.1(6) . . ?
C62 C61 H61A 109.9 . . ?
O3 C61 H61A 109.9 . . ?
C62 C61 H61B 109.9 . . ?
O3 C61 H61B 109.9 . . ?
H61A C61 H61B 108.3 . . ?
C61 C62 O4 112.9(8) . . ?
C61 C62 H62A 109.0 . . ?
O4 C62 H62A 109.0 . . ?
C61 C62 H62B 109.0 . . ?
O4 C62 H62B 109.0 . . ?
H62A C62 H62B 107.8 . . ?
O4 C63 C64 110.2(6) . . ?
O4 C63 H63A 109.6 . . ?
C64 C63 H63A 109.6 . . ?
O4 C63 H63B 109.6 . . ?
C64 C63 H63B 109.6 . . ?
H63A C63 H63B 108.1 . . ?
N1 C64 C63 114.4(5) . . ?
N1 C64 H64A 108.7 . . ?
C63 C64 H64A 108.7 . . ?
N1 C64 H64B 108.7 . . ?
C63 C64 H64B 108.7 . . ?
H64A C64 H64B 107.6 . . ?
C66 C65 N1 112.0(5) . . ?
C66 C65 H65A 109.2 . . ?
N1 C65 H65A 109.2 . . ?
C66 C65 H65B 109.2 . . ?
N1 C65 H65B 109.2 . . ?
H65A C65 H65B 107.9 . . ?
O5 C66 C65 107.6(4) . . ?
O5 C66 H66A 110.2 . . ?
C65 C66 H66A 110.2 . . ?
O5 C66 H66B 110.2 . . ?
C65 C66 H66B 110.2 . . ?
H66A C66 H66B 108.5 . . ?
O5 C67 C68 110.8(5) . . ?
O5 C67 H67A 109.5 . . ?
C68 C67 H67A 109.5 . . ?
O5 C67 H67B 109.5 . . ?
C68 C67 H67B 109.5 . . ?
H67A C67 H67B 108.1 . . ?
O6 C68 C67 108.6(4) . . ?
O6 C68 H68A 110.0 . . ?
C67 C68 H68A 110.0 . . ?
O6 C68 H68B 110.0 . . ?
C67 C68 H68B 110.0 . . ?
H68A C68 H68B 108.4 . . ?
O6 C69 C70 109.4(5) . . ?
O6 C69 H69A 109.8 . . ?
C70 C69 H69A 109.8 . . ?
O6 C69 H69B 109.8 . . ?
C70 C69 H69B 109.8 . . ?
H69A C69 H69B 108.2 . . ?
N2 C70 C69 112.1(4) . . ?
N2 C70 H70A 109.2 . . ?
C69 C70 H70A 109.2 . . ?
N2 C70 H70B 109.2 . . ?
C69 C70 H70B 109.2 . . ?
H70A C70 H70B 107.9 . . ?
C72 C71 N3 110.7(5) . . ?
C72 C71 H71A 109.5 . . ?
N3 C71 H71A 109.5 . . ?
C72 C71 H71B 109.5 . . ?
N3 C71 H71B 109.5 . . ?
H71A C71 H71B 108.1 . . ?
O7 C72 C71 107.7(5) . . ?
O7 C72 H72A 110.2 . . ?
C71 C72 H72A 110.2 . . ?
O7 C72 H72B 110.2 . . ?
C71 C72 H72B 110.2 . . ?
H72A C72 H72B 108.5 . . ?
O7 C73 C74 108.1(5) . . ?
O7 C73 H73A 110.1 . . ?
C74 C73 H73A 110.1 . . ?
O7 C73 H73B 110.1 . . ?
C74 C73 H73B 110.1 . . ?
H73A C73 H73B 108.4 . . ?
O8 C74 C73 107.6(5) . . ?
O8 C74 H74A 110.2 . . ?
C73 C74 H74A 110.2 . . ?
O8 C74 H74B 110.2 . . ?
C73 C74 H74B 110.2 . . ?
H74A C74 H74B 108.5 . . ?
O8 C75 C76 114.4(6) . . ?
O8 C75 H75A 108.7 . . ?
C76 C75 H75A 108.7 . . ?
O8 C75 H75B 108.7 . . ?
C76 C75 H75B 108.7 . . ?
H75A C75 H75B 107.6 . . ?
N4 C76 C75 113.8(6) . . ?
N4 C76 H76A 108.8 . . ?
C75 C76 H76A 108.8 . . ?
N4 C76 H76B 108.8 . . ?
C75 C76 H76B 108.8 . . ?
H76A C76 H76B 107.7 . . ?
N4 C77 C78 112.6(5) . . ?
N4 C77 H77A 109.1 . . ?
C78 C77 H77A 109.1 . . ?
N4 C77 H77B 109.1 . . ?
C78 C77 H77B 109.1 . . ?
H77A C77 H77B 107.8 . . ?
O9 C78 C77 112.2(5) . . ?
O9 C78 H78A 109.2 . . ?
C77 C78 H78A 109.2 . . ?
O9 C78 H78B 109.2 . . ?
C77 C78 H78B 109.2 . . ?
H78A C78 H78B 107.9 . . ?
O9 C79 C80 107.9(5) . . ?
O9 C79 H79A 110.1 . . ?
C80 C79 H79A 110.1 . . ?
O9 C79 H79B 110.1 . . ?
C80 C79 H79B 110.1 . . ?
H79A C79 H79B 108.4 . . ?
O10 C80 C79 111.3(4) . . ?
O10 C80 H80A 109.4 . . ?
C79 C80 H80A 109.4 . . ?
O10 C80 H80B 109.4 . . ?
C79 C80 H80B 109.4 . . ?
H80A C80 H80B 108.0 . . ?
O10 C81 C82 111.0(4) . . ?
O10 C81 H81A 109.4 . . ?
C82 C81 H81A 109.4 . . ?
O10 C81 H81B 109.4 . . ?
C82 C81 H81B 109.4 . . ?
H81A C81 H81B 108.0 . . ?
N3 C82 C81 114.0(5) . . ?
N3 C82 H82A 108.7 . . ?
C81 C82 H82A 108.7 . . ?
N3 C82 H82B 108.7 . . ?
C81 C82 H82B 108.7 . . ?
H82A C82 H82B 107.6 . . ?
N3 C83 C84 111.0(5) . . ?
N3 C83 H83A 109.4 . . ?
C84 C83 H83A 109.4 . . ?
N3 C83 H83B 109.4 . . ?
C84 C83 H83B 109.4 . . ?
H83A C83 H83B 108.0 . . ?
O11 C84 C83 105.4(5) . . ?
O11 C84 H84A 110.7 . . ?
C83 C84 H84A 110.7 . . ?
O11 C84 H84B 110.7 . . ?
C83 C84 H84B 110.7 . . ?
H84A C84 H84B 108.8 . . ?
O11 C85 C86 111.4(5) . . ?
O11 C85 H85A 109.3 . . ?
C86 C85 H85A 109.3 . . ?
O11 C85 H85B 109.3 . . ?
C86 C85 H85B 109.3 . . ?
H85A C85 H85B 108.0 . . ?
O12 C86 C85 107.7(4) . . ?
O12 C86 H86A 110.2 . . ?
C85 C86 H86A 110.2 . . ?
O12 C86 H86B 110.2 . . ?
C85 C86 H86B 110.2 . . ?
H86A C86 H86B 108.5 . . ?
O12 C87 C88 111.2(5) . . ?
O12 C87 H87A 109.4 . . ?
C88 C87 H87A 109.4 . . ?
O12 C87 H87B 109.4 . . ?
C88 C87 H87B 109.4 . . ?
H87A C87 H87B 108.0 . . ?
N4 C88 C87 112.5(4) . . ?
N4 C88 H88A 109.1 . . ?
C87 C88 H88A 109.1 . . ?
N4 C88 H88B 109.1 . . ?
C87 C88 H88B 109.1 . . ?
H88A C88 H88B 107.8 . . ?
O6 Li1 O2 93.0(4) . . ?
O6 Li1 O1 164.2(5) . . ?
O2 Li1 O1 75.2(3) . . ?
O6 Li1 O5 77.8(3) . . ?
O2 Li1 O5 100.4(4) . . ?
O1 Li1 O5 114.2(4) . . ?
O6 Li1 N1 114.7(4) . . ?
O2 Li1 N1 150.9(5) . . ?
O1 Li1 N1 78.9(3) . . ?
O5 Li1 N1 78.4(3) . . ?
O6 Li1 O4 88.9(3) . . ?
O2 Li1 O4 122.1(4) . . ?
O1 Li1 O4 88.7(4) . . ?
O5 Li1 O4 136.2(4) . . ?
N1 Li1 O4 69.7(3) . . ?
O7 Li2 O12 165.4(5) . . ?
O7 Li2 O8 76.1(3) . . ?
O12 Li2 O8 90.1(3) . . ?
O7 Li2 O11 110.1(4) . . ?
O12 Li2 O11 75.4(3) . . ?
O8 Li2 O11 94.6(4) . . ?
O7 Li2 N3 78.0(3) . . ?
O12 Li2 N3 116.6(4) . . ?
O8 Li2 N3 148.5(5) . . ?
O11 Li2 N3 77.7(3) . . ?
O7 Li2 O10 95.0(3) . . ?
O12 Li2 O10 89.5(4) . . ?
O8 Li2 O10 127.7(4) . . ?
O11 Li2 O10 135.4(4) . . ?
N3 Li2 O10 72.1(3) . . ?

_diffrn_measured_fraction_theta_max    0.983
_diffrn_reflns_theta_full              27.50
_diffrn_measured_fraction_theta_full   0.983
_refine_diff_density_max    1.233
_refine_diff_density_min   -0.562
_refine_diff_density_rms    0.094

#===END
